# Supplementary material for: Unraveling multimodality of digital health records by comparing mortality trajectories of diagnoses of diseases from over 12 million patients
Source: PubMed Central journal article supplement (PMC11793822; doi:10.1371/journal.pone.0314993), 2025-02-04
Supplement: pone.0314993.s002.pdf [file pone.0314993.s002.pdf]

**A.**

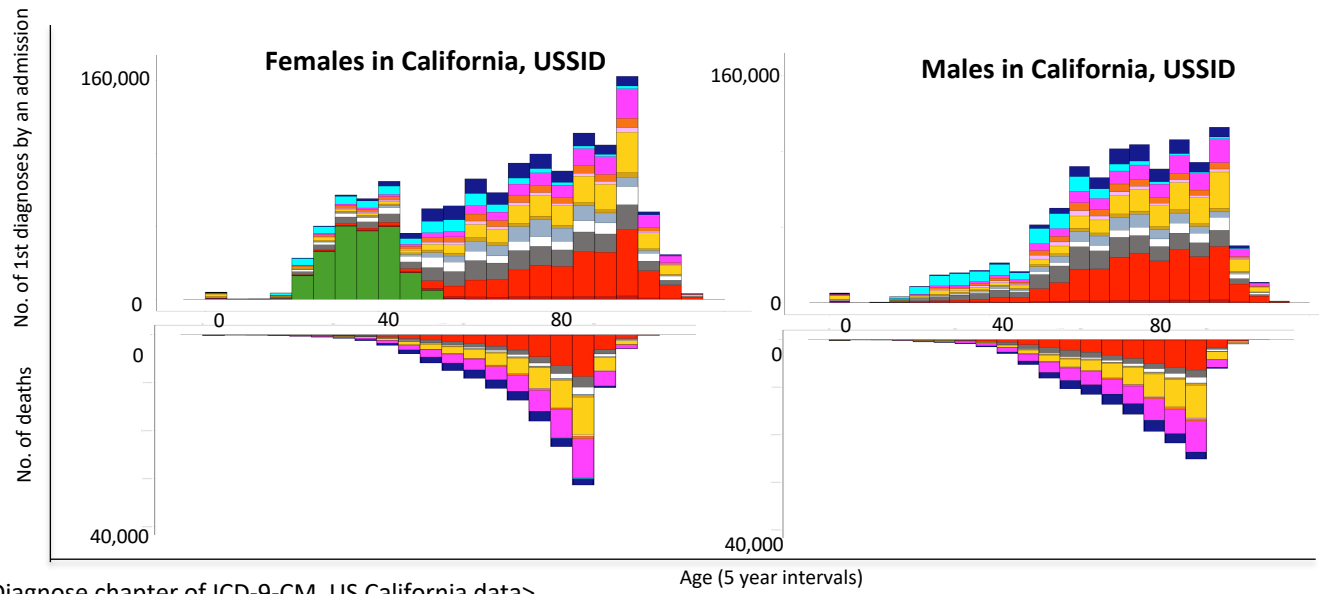

<Diagnose chapter of ICD-9-CM, US California data>

- Complications of pregnancy, childbirth, and puerperium
- Disease of respiratory system
- Congenital anomalies
- Disease of skin and subcutaneous tissue
- Diseases of blood and blood forming organs
- Endocrine, nutritional, and metabolic diseases and immunity disorders
- Disease of circulatory system
- Infectious and parasitic diseases
- Diseases of digestive system
- Mental disorders
- Diseases of genitourinary system
- Neoplasms
- Diseases of musculoskeletal and connective tissue
- Newborn (Perinatal) guidelines
- Diseases of nervous system and sense organs

**B.**

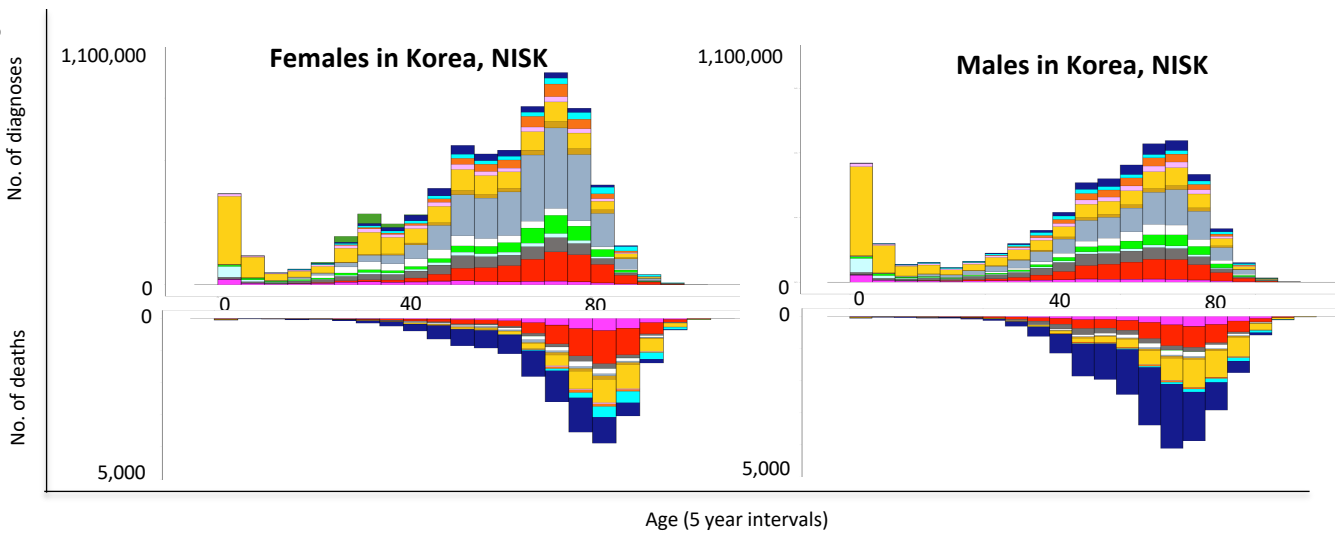

<Diagnose chapter of ICD-10, South Korea data>

- Certain infectious and parasitic diseases
- Diseases of the genitourinary system
- Congenital malformation, deformation and chromosomal abnormalities
- Diseases of the musculoskeletal system and connective tissue
- Diseases of the blood and blood-forming organs and certain disorders involving the immune mechanism
- Diseases of the nervous system
- Diseases of the circulatory system
- Diseases of the respiratory system
- Diseases of the digestive system
- Diseases of the skin and subcutaneous tissue
- Endocrine, nutritional and metabolic diseases
- Diseases of the ear and mastoid process
- Mental and behavioral disorders
- Diseases of the eye and adnexa
- Neoplasms
- Pregnancy, childbirth and the puerperium

**Supplemental figure 1. Histograms of diagnosis distributions in the USSID and the NISK,**

(A) Distribution of diagnosis with each admission and death outcomes in the USSID by sex and ages. (B) Distribution of diagnosis with each case and death outcomes in the NISK by sex and age.
