# Supplementary material for: Unraveling multimodality of digital health records by comparing mortality trajectories of diagnoses of diseases from over 12 million patients
Source: PubMed Central journal article supplement (PMC11793822; doi:10.1371/journal.pone.0314993), 2025-02-04
Supplement: pone.0314993.s003.pdf [file pone.0314993.s003.pdf]

## <Trajectories from disease to death in US, the USSID>

### A. Deadliest trajectory for all age

Total no. of death: 2,071

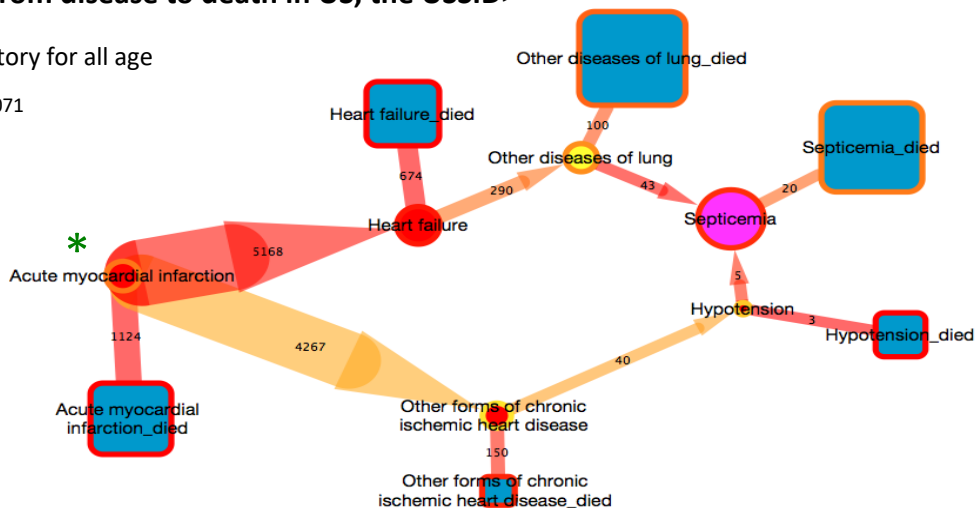

### B.

#### Deadliest trajectory for younger ages (< 60 years)

Total no. of death: 1,679

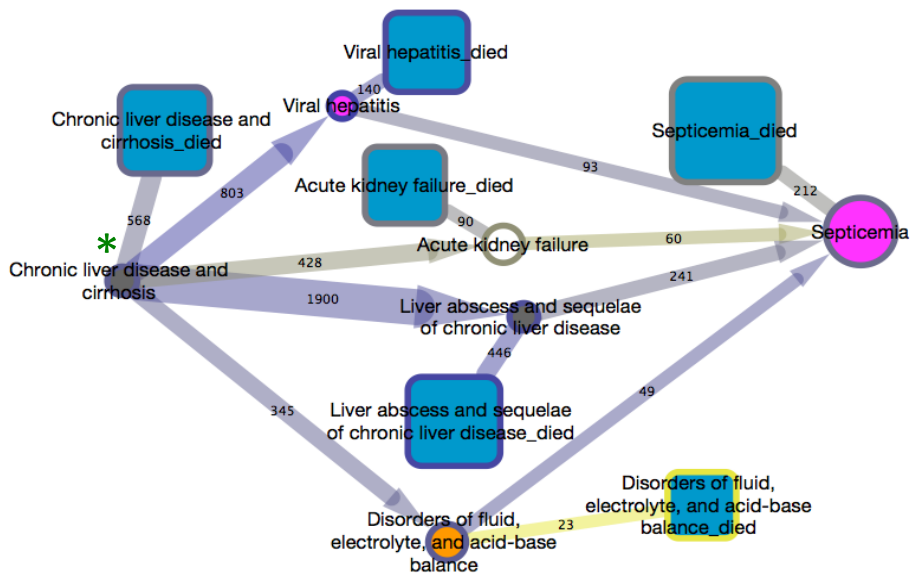

### C. Deadliest trajectory for elders (> 75 years)

Total no. of death: 1,371

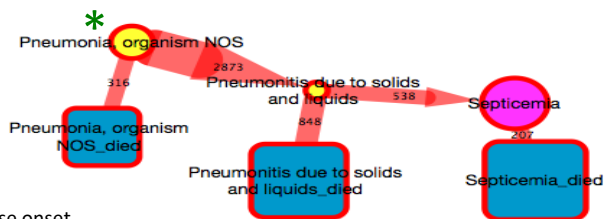

#### <Node colors: diagnosis chapter>

- Infectious and parasitic diseases
- Disease of respiratory system
- Disease of blood & blood forming organs
- Disease of circulatory system
- Disease of digestive system
- Disease of genitourinary system
- Endocrine, nutritional, metabolic and immunology disease

\* 1st of disease onset

<Color of edge/ boarder of node>

Mean age of shared patients

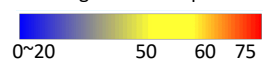

○ Disease (size by incidence)

□ Death (size by CFR)

## Supplemental figure 2. Trajectory of diagnosis with largest number of deaths in the USSID,

(A) Deadliest trajectory of disease in the USSID for all ages. (B) Deadliest trajectory of disease in the USSID for young age groups (<60 years). (C) Deadliest trajectory of disease in the USSID for elders
