# Supplementary material for: Unraveling multimodality of digital health records by comparing mortality trajectories of diagnoses of diseases from over 12 million patients
Source: PubMed Central journal article supplement (PMC11793822; doi:10.1371/journal.pone.0314993), 2025-02-04
Supplement: pone.0314993.s005.pdf [file pone.0314993.s005.pdf]

## NISK

n=763,891

diagnosis filtering  
- injury, regular  
check excluded  
(ICD-10)

DAG based  
diagnosis  
trajectory  
modeling\*

No. trajectory=405  
1st diagnosis &  
end-stage analysis  
(Fig4)

Paired edge analysis in  
network (Fig 5-6), Edge=5869  
- disease-to-disease pair  
- disease-to-death pair

Mortality associated edge  
analysis (Fig 8)  
- disease-to-death pair  
- cancer diagnosis analysis

## USSID

n=1,488,551

diagnosis filtering  
- injury, regular  
check excluded  
(ICD-9-CM)

DAG based  
diagnosis  
trajectory  
modeling\*

No. trajectory=300  
1st diagnosis &  
end-stage analysis  
(Fig 4)

Paired edge analysis in  
network (Fig 5,6), Edge=460  
- disease-to-disease pair  
- disease-to-death pair

Mortality associated edge  
analysis (Fig 7)  
- disease-to-death pair  
- cardiac disease analysis

### Supplemental figure 4. Analysis overview

\*Directed Acyclic Graph modeling, details are presented in Figure 3
